# Supplementary material for: Detection of potentially toxic metals by SERS using salen complexes
Source: Royal Society of Chemistry journal article supplement (doi:10.1039/c6an01584k), 2016-01-01
Supplement: c6an01584k1.pdf [file c6an01584k1.pdf]

## Detection of Potentially Toxic Metals by SERS using Salen Complexes

Julie Docherty, Samuel Mabbott, Ewen Smith, Karen Faulds, Christine Davidson, John Reglinski and Duncan Graham

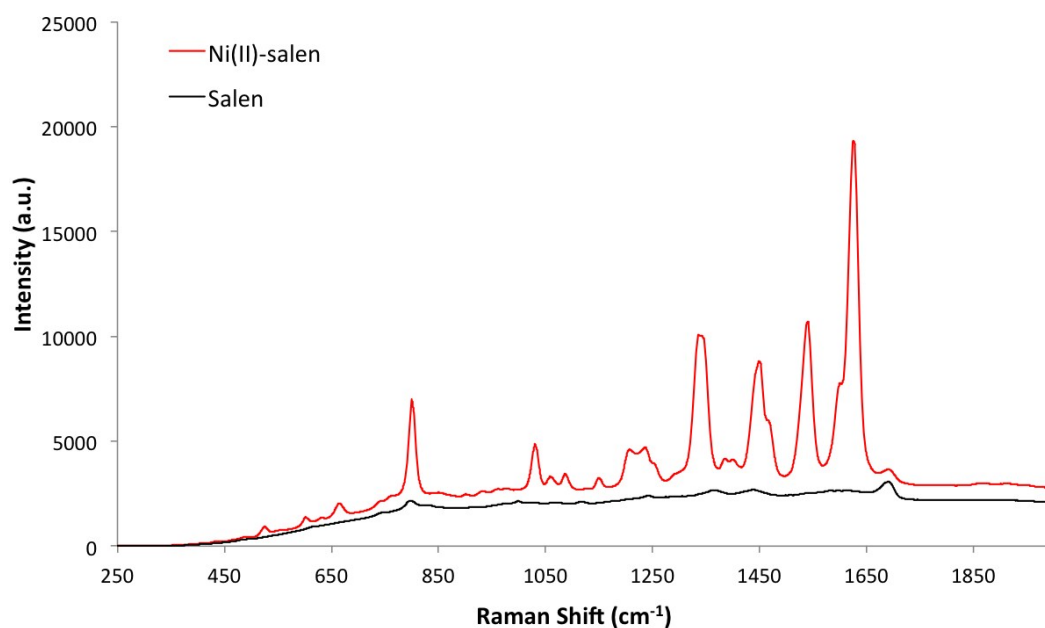

Figure S 1: Comparison of the SERS spectrum of the free salen ligand (black) to that of the Ni(II)-salen complex (red) ( $\lambda_{\text{ex}} = 532 \text{ nm}$ ; acc. time = 10s)

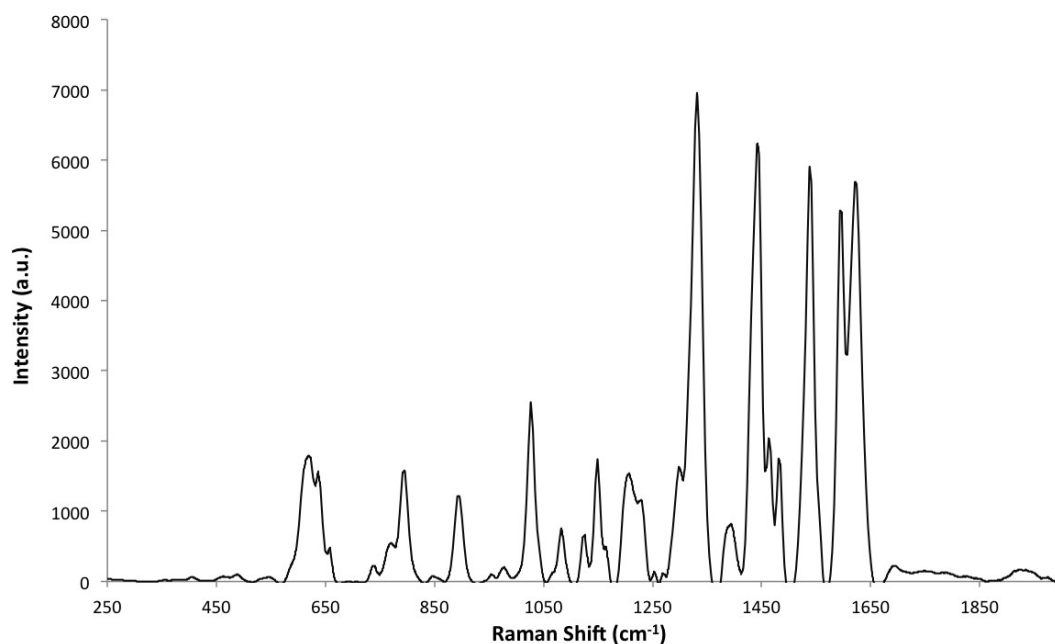

Figure S 2: SERS spectrum obtained from the contaminated freshwater ( $\lambda_{\text{ex}} = 532 \text{ nm}$ ; acc. time = 10s)
